# Supplementary material for: Reversible magnetomechanical collapse: virtual touching and detachment of rigid inclusions in a soft elastic matrix
Source: Royal Society of Chemistry journal article supplement (doi:10.1039/c8sm01051j), 2018-01-01
Supplement: c8sm01051j1.pdf [file c8sm01051j1.pdf]

## Electronic Supplementary Information (ESI)

### Reversible magnetomechanical collapse: virtual touching and detachment of rigid inclusions in a soft elastic matrix

Mate Puljiz,<sup>a</sup> Shilin Huang,<sup>b</sup> Karl A. Kalina,<sup>c</sup>  
Johannes Nowak,<sup>d</sup> Stefan Odenbach,<sup>d</sup> Markus Kästner,<sup>c</sup>  
Günter K. Auernhammer,<sup>b,e</sup> and Andreas M. Menzel<sup>a</sup>

<sup>a</sup> Institut für Theoretische Physik II: Weiche Materie, Heinrich-Heine-Universität Düsseldorf, 40225 Düsseldorf, Germany.

<sup>b</sup> Max Planck Institute for Polymer Research, Ackermannweg 10, 55128 Mainz, Germany.

<sup>c</sup> Technische Universität Dresden, Institute of Solid Mechanics, 01062 Dresden, Germany.

<sup>d</sup> Technische Universität Dresden, Institute of Fluid Mechanics, 01062 Dresden, Germany.

<sup>e</sup> Leibniz Institute for Polymer Research, 01069 Dresden, Germany (present address).

In the figure on the next page, we illustrate the strong local deformation fields occurring between the two approaching particles. There, we show results from direct purely elastic finite-element simulations of the Neo-Hookean model when the two particles of radius  $a$  are driven towards each other within the soft elastic matrix, see the main article. The initial center-to-center particle separation was  $r_{12}^{(0)}/a \approx 3.57$ . All results are obtained directly from the simulations, without extrapolation of the deformations, down to center-to-center particle distances  $r_{12}/a \approx 2.1$ . (This implies an approach of the surface-to-surface distance down to  $a/10$ .) More precisely, states for (a)  $r_{12}/a \approx 2.9$ , (b)  $r_{12}/a \approx 2.4$ , and (c)  $r_{12}/a \approx 2.1$  are displayed.

We depict the components  $u_1$  and  $u_2$  of the local displacement field along the axes  $x_1$  and  $x_2$ , respectively. Furthermore, to characterize the degree of compression of the deformed matrix along the corresponding principal axis, the spatial variation of the smallest principal stretch  $\lambda_3$  is illustrated. The pure stretch of a line element is defined as

$$\lambda = \frac{ds}{dS} > 0,$$

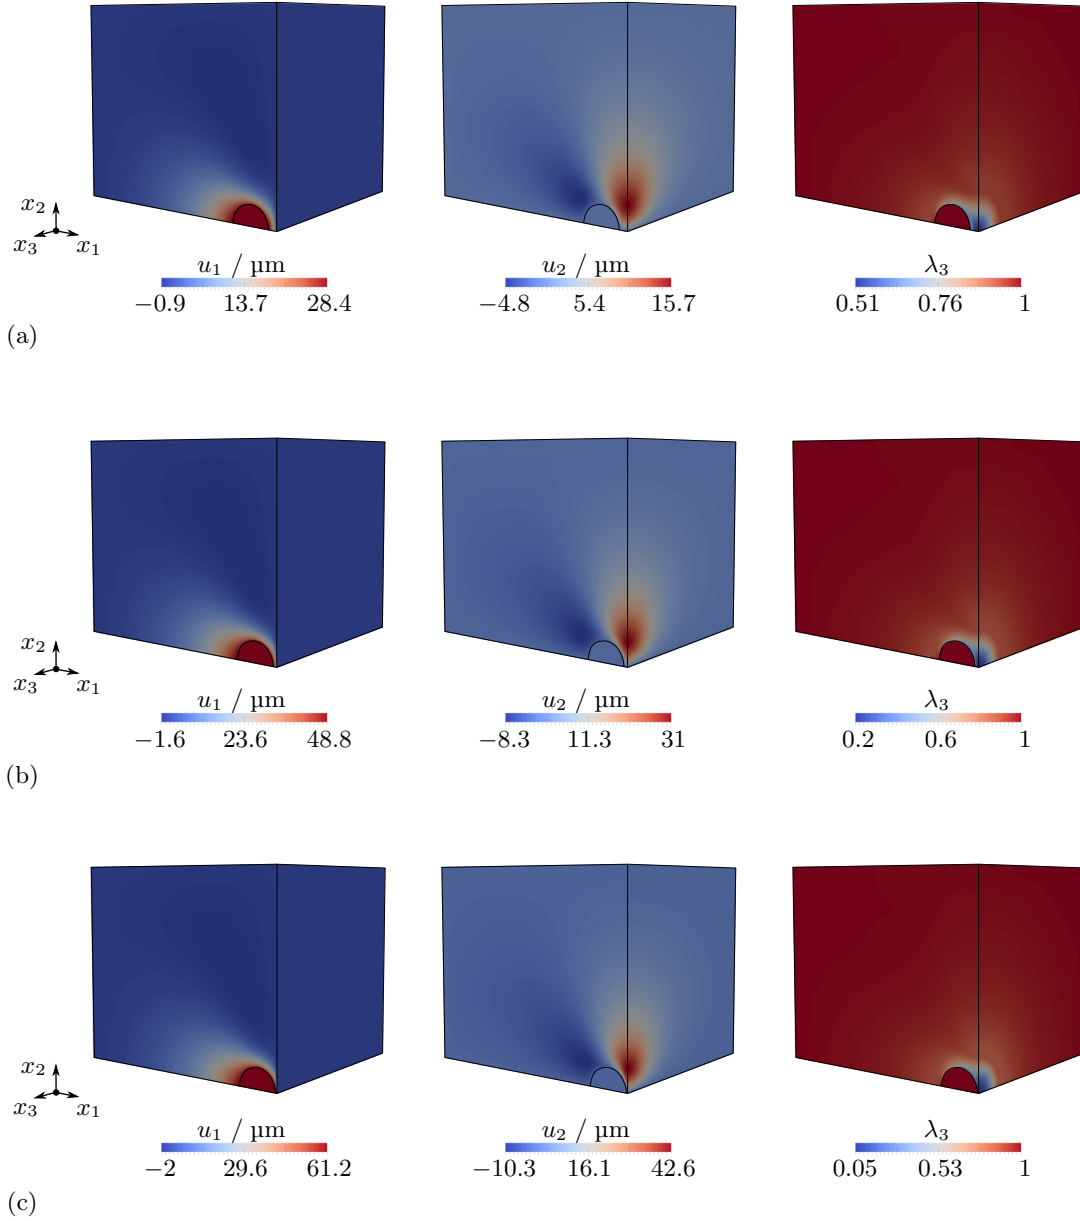

Figure: Results from the mechanical part of the direct finite-element simulations of the elastic Neo-Hookean model in the set-up described in the main article. Components  $u_1$  and  $u_2$  along the axes  $x_1$  and  $x_2$ , respectively, of the local displacement field are shown, together with the spatial variation of the smallest principal stretch  $\lambda_3$  within the polymer matrix.  $0 < \lambda_3 < 1$  indicates compression along the corresponding principal axis. From top to bottom, the inter-particle distance decreases as (a)  $r_{12}/a \approx 2.9$ , (b)  $r_{12}/a \approx 2.4$ , and (c)  $r_{12}/a \approx 2.1$ .

where  $ds$  and  $dS$  denote the infinitesimal length in the deformed and in the undeformed state, respectively. Basically, the quasi-incompressible matrix ( $\nu = 0.49$  within the simulation) is squeezed out from between the particles by the particle approach. Between the particles, a region of extreme compression occurs along the corresponding local principal axis of deformation.
